# Supplementary material for: Fractionation and characterization of starch granules using field-flow fractionation (FFF) and differential scanning calorimetry (DSC)
Source: PubMed Central journal article supplement (PMC6571092; doi:10.1007/s00216-019-01852-9), 2019-05-08
Supplement: 216_2019_1852_MOESM1_ESM.pdf [file 216_2019_1852_MOESM1_ESM.pdf]

**Analytical and Bioanalytical Chemistry**

**Electronic Supplementary Material**

**Fractionation and characterization of starch granules using  
field-flow fractionation (FFF) and differential scanning calorimetry (DSC)**

Catalina Fuentes, In Kang, Jangjae Lee, Dongsup Song, Malin Sjöo, Jaeyeong Choi,  
Seungho Lee, Lars Nilsson

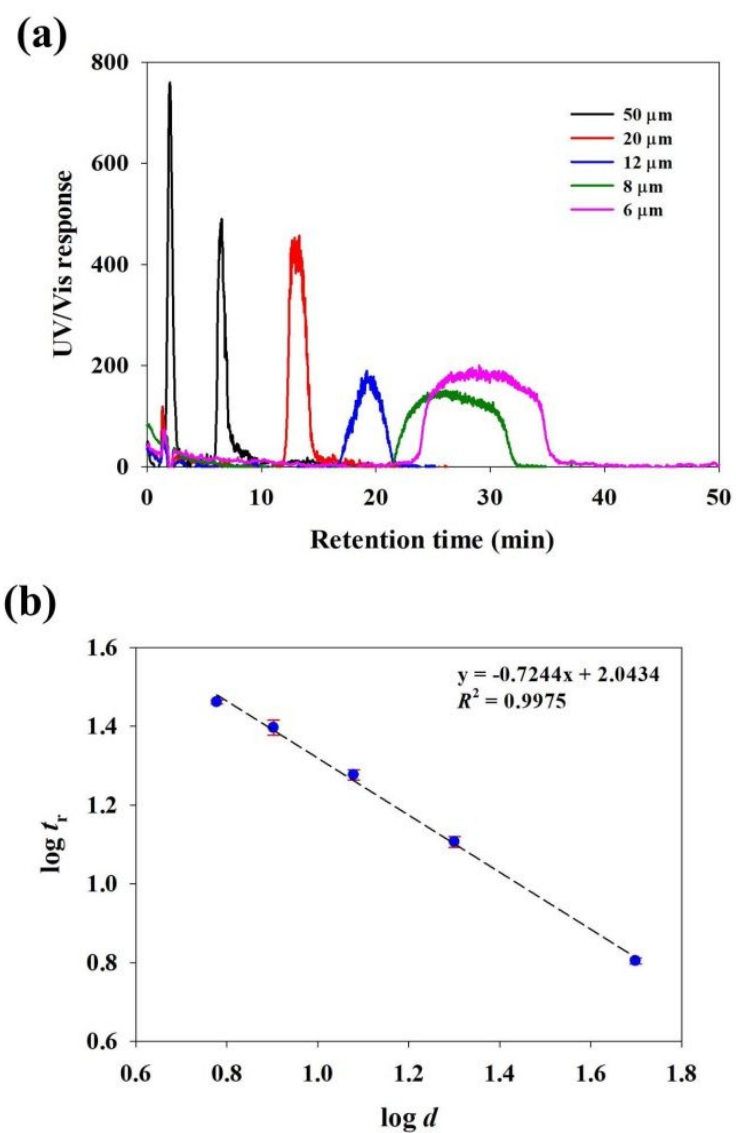

**Fig. S1** GrFFF fractograms of polystyrene latex beads having nominal diameters of 6, 8, 12, 20 and 50  $\mu\text{m}$ , respectively (a) and a calibration curve (b)

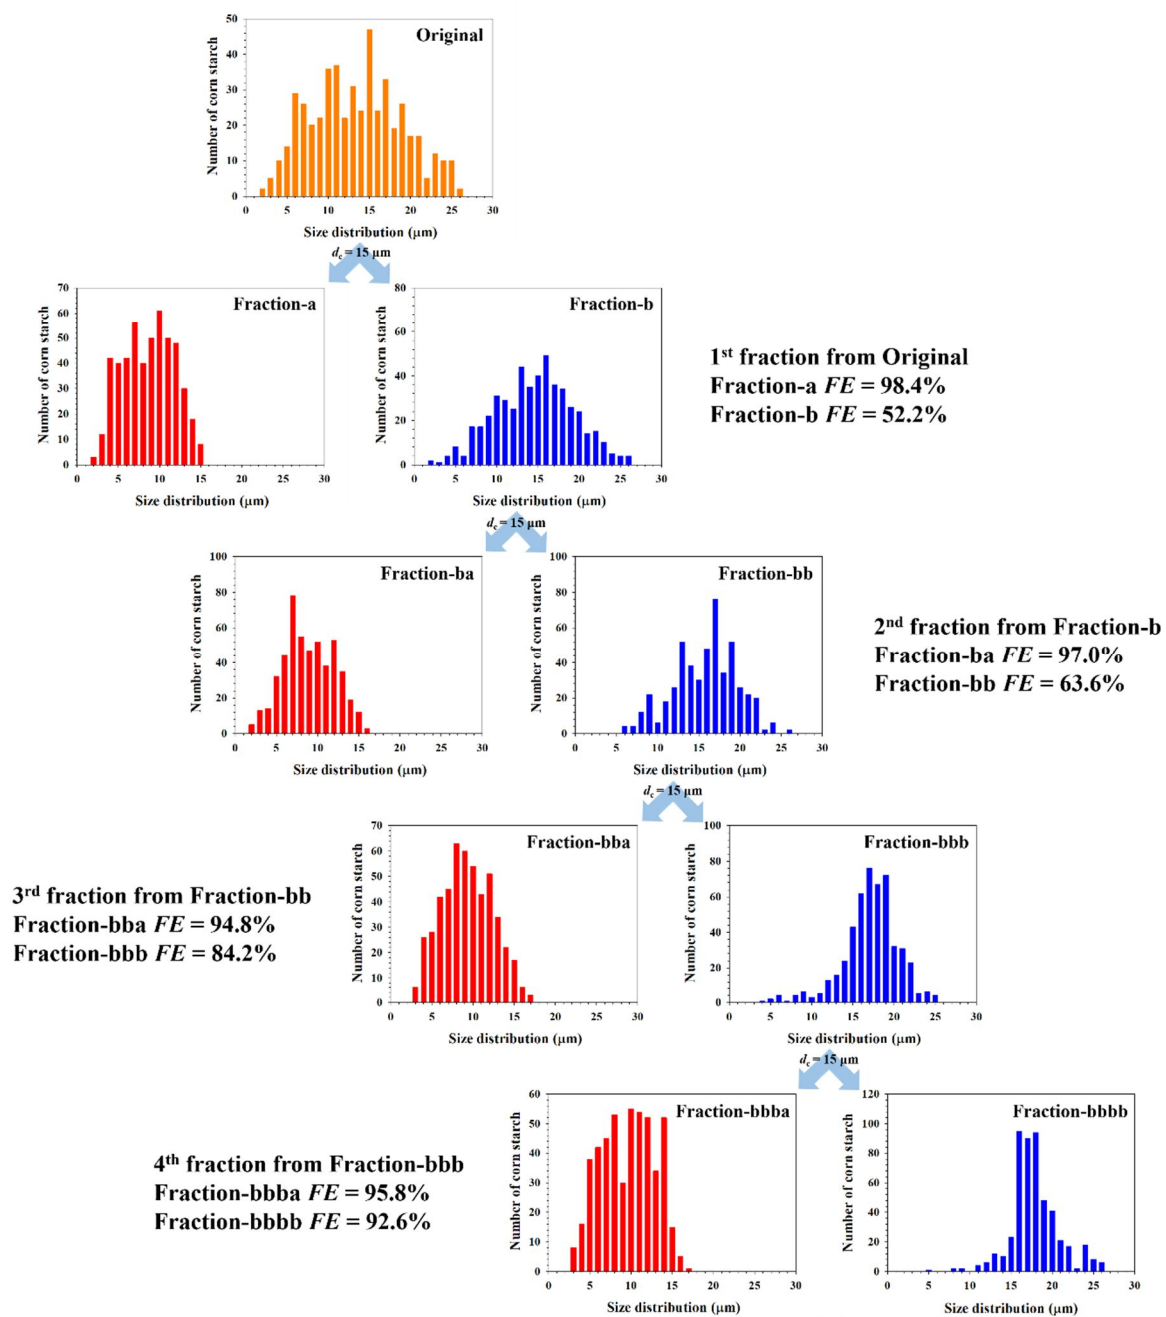

**Fig. S2** Number based size distributions and  $FE$ 's from OM obtained for FFD-SF fractions of corn starch,  $n=500$

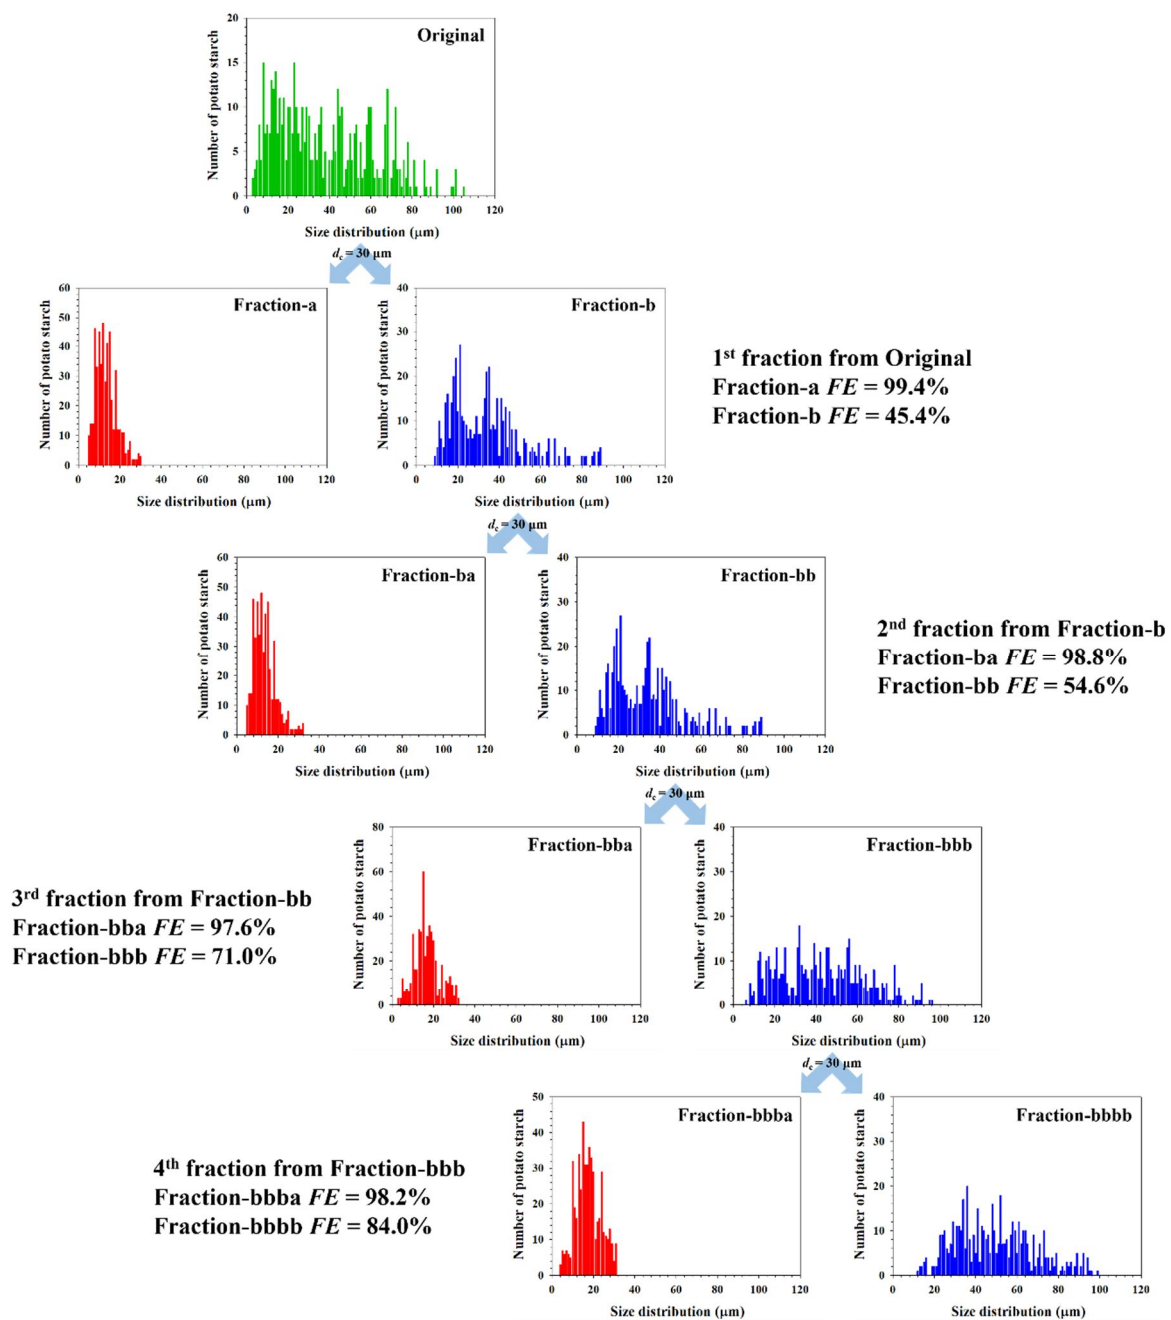

**Fig. S3** Number based size distributions and  $FE$ 's from OM obtained for FFD-SF fractions of potato starch,  $n=500$

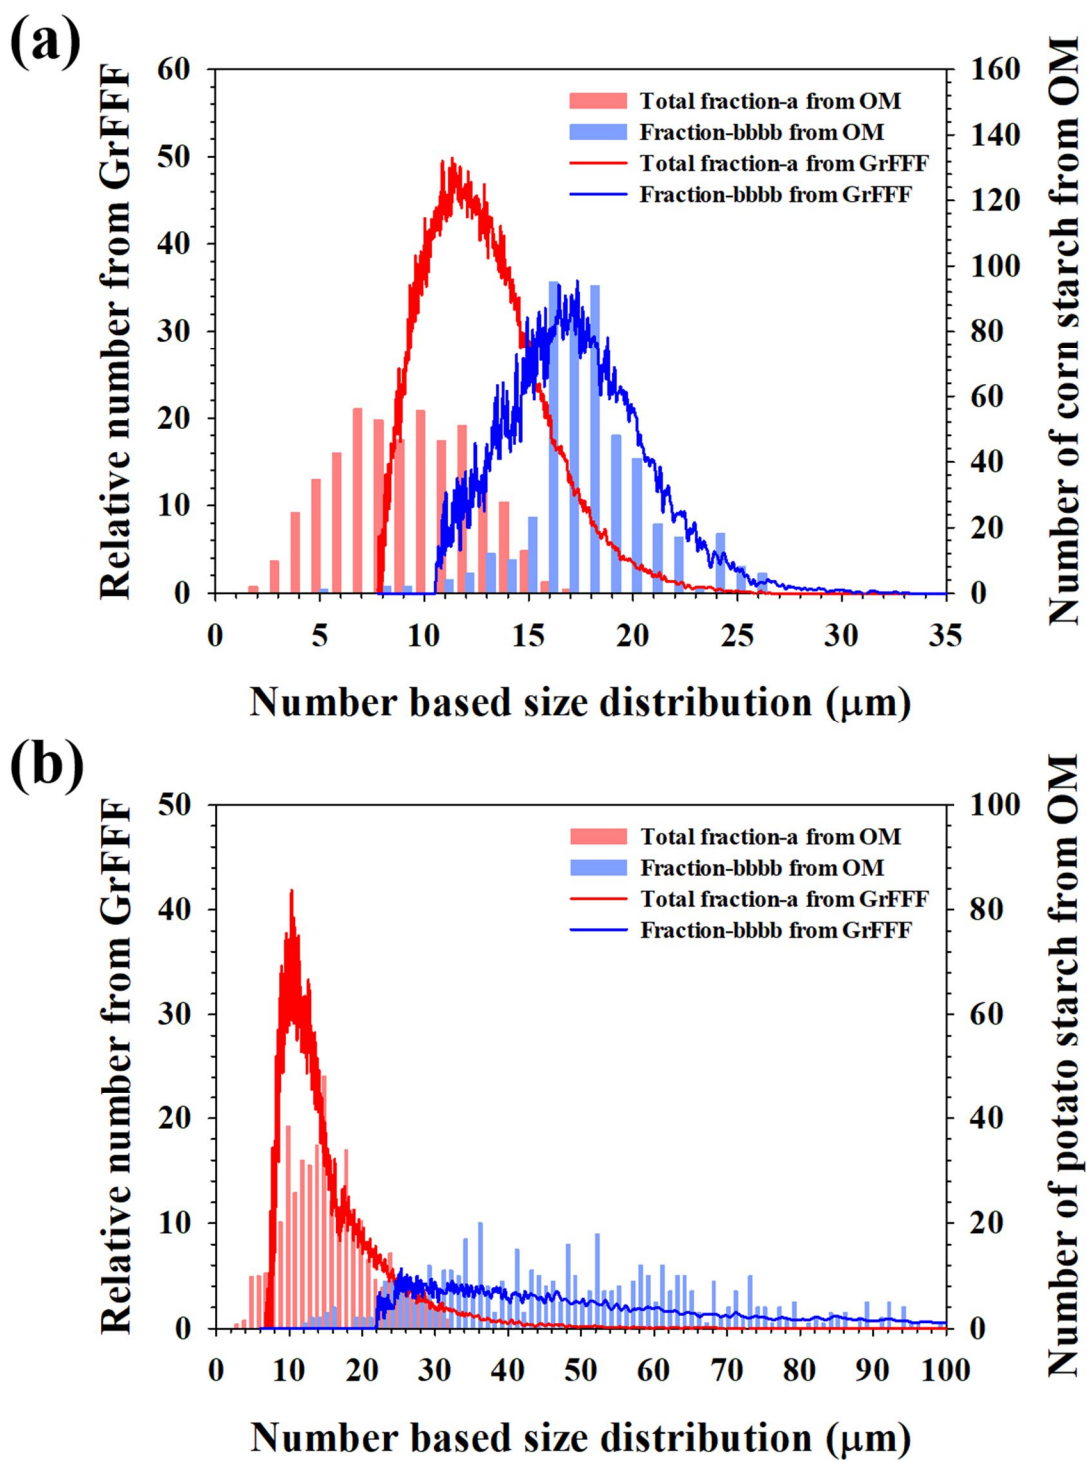

**Fig. S4** Number based size distributions from OM (bars) and GrFFF (solid lines) for FFD-SF fractions of corn (a) and potato starch (b)
